# Supplementary material for: The Associations between Kidney Function and Sexual Dysfunction among Males and Females with Type 2 Diabetes Mellitus
Source: MDPI journal article supplement (doi:10.3390/medicina59050969), 2023-05-17
Supplement: s1 [file s1]

**Supplementary Table S3. Medication of the female study population based on female sexual function.**

|                    | Without FSD<br>N=8 | With FSD<br>N=22 | P     |
|--------------------|--------------------|------------------|-------|
| Metformin          | 7 (87.5%)          | 18 (85.7%)       | 0.901 |
| GLP1-RA            | 1 (12.5%)          | 5 (22.7%)        | 0.536 |
| SGLT2i             | 1 (12.5%)          | 7 (31.8%)        | 0.290 |
| Glitazones         | 0 (0%)             | 1 (4.5%)         | 0.540 |
| Sulfonylurias      | 0 (0%)             | 2 (9.1%)         | 0.377 |
| DPP-4 inhibitors   | 2 (25%)            | 6 (27.3%)        | 0.901 |
| Insulin            | 2 (25%)            | 7 (31.8%)        | 0.719 |
| ACEi/ARB           | 5 (62.5%)          | 16 (72.7%)       | 0.589 |
| CCB                | 4 (50%)            | 7 (31.8%)        | 0.361 |
| Thiazide diuretics | 2 (25%)            | 5 (22.7%)        | 0.896 |
| Loop diuretics     | 0 (0%)             | 0 (0%)           | -     |
| Beta blocker       | 2 (25%)            | 6 (27.3%)        | 0.901 |
| MRA                | 0 (0%)             | 2 (9.1%)         | 0.377 |
| Statins            | 2 (25%)            | 16 (72.7%)       | 0.018 |

Expressed as n(%)

ACEi: Angiotensin-converting enzyme inhibitors; ARB: Angiotensin receptor blockers; CCB: Calcium channel blocker; DPP-4: Dipeptidyl peptidase-4; FSD: female sexual function; GLP1-RA: Glucagon-like peptide-1 receptor agonists; MRA: Mineralocorticoid receptor antagonists; SGLT2i: Sodium-glucose Cotransporter-2 inhibitors
