# Supplementary material for: The Associations between Kidney Function and Sexual Dysfunction among Males and Females with Type 2 Diabetes Mellitus
Source: MDPI journal article supplement (doi:10.3390/medicina59050969), 2023-05-17
Supplement: s1 [file s1]

**Supplementary Table S1. Medication of the study population according to the presence of sexual dysfunction.**

|                    | Total patients<br>N=80 | Without sexual<br>dysfunction<br>N=16 | With sexual<br>dysfunction<br>N=64 | P     |
|--------------------|------------------------|---------------------------------------|------------------------------------|-------|
| Metformin          | 67 (84.8%)             | 14 (87.5%)                            | 53 (84.1%)                         | 0.737 |
| GLP1-RA            | 12 (15%)               | 2 (12.5%)                             | 10 (15.6%)                         | 0.754 |
| SGLT2i             | 18 (22.5%)             | 3 (18.8%)                             | 15 (23.4%)                         | 0.688 |
| Glitazones         | 1 (1.3%)               | 0 (0%)                                | 1 (1.6%)                           | 0.615 |
| Sulfonylurias      | 7 (8.8%)               | 1 (6.3%)                              | 6 (9.4%)                           | 0.692 |
| DPP-4 inhibitors   | 23 (28.7%)             | 4 (25%)                               | 19 (29.7%)                         | 0.711 |
| Insulin            | 23 (28.7%)             | 5 (31.3%)                             | 18 (28.1%)                         | 0.805 |
| ACEi/ARB           | 50 (62.5%)             | 9 (56.3%)                             | 41 (64.1%)                         | 0.564 |
| CCB                | 29 (36.3%)             | 7 (43.8%)                             | 22 (34.4%)                         | 0.485 |
| Thiazide diuretics | 18 (22.5%)             | 2 (12.5%)                             | 16 (25%)                           | 0.284 |
| Loop diuretics     | 9 (11.3%)              | 0 (0%)                                | 9 (14.1%)                          | 0.111 |
| Beta blocker       | 31 (38.8%)             | 5 (31.3%)                             | 26 (40.6%)                         | 0.491 |
| MRA                | 6 (7.5%)               | 0 (0%)                                | 6 (9.4%)                           | 0.203 |
| Statins            | 46 (57.5%)             | 6 (37.5%)                             | 40 (80%)                           | 0.07  |

Expressed as n(%)

ACEi: Angiotensin-converting enzyme inhibitors; ARB: Angiotensin receptor blockers; CCB: Calcium channel blocker; DPP-4: Dipeptidyl peptidase-4; GLP1-RA: Glucagon-like peptide-1 receptor agonists; MRA: Mineralocorticoid receptor antagonists; SGLT2i: Sodium-glucose Cotransporter-2 inhibitors
