# Supplementary material for: The Associations between Kidney Function and Sexual Dysfunction among Males and Females with Type 2 Diabetes Mellitus
Source: MDPI journal article supplement (doi:10.3390/medicina59050969), 2023-05-17
Supplement: s1 [file s1]

**Supplementary Table S2. Medication of the male study population according to the presence of erectile function.**

|                    | Without ED<br>N=7 | With ED<br>N=43 | P     |
|--------------------|-------------------|-----------------|-------|
| Metformin          | 7 (100%)          | 35 (81.4%)      | 0.213 |
| GLP1-RA            | 1 (14.3%)         | 5 (11.6%)       | 0.841 |
| SGLT2i             | 2 (28.6%)         | 8 (18.6%)       | 0.541 |
| Glitazones         | 0 (0%)            | 0 (0%)          | -     |
| Sulfonylurias      | 1 (14.3%)         | 4 (9.3%)        | 0.684 |
| DPP-4 inhibitors   | 2 (28.6%)         | 13 (30.2%)      | 0.929 |
| Insulin            | 3 (42.9%)         | 11 (25.6%)      | 0.345 |
| ACEi/ARB           | 3 (42.9%)         | 26 (60.5%)      | 0.381 |
| CCB                | 3 (42.9%)         | 15 (34.9%)      | 0.684 |
| Thiazide diuretics | 0 (0%)            | 11 (25.6%)      | 0.130 |
| Loop diuretics     | 0 (0%)            | 9 (20.9%)       | 0.181 |
| Beta blocker       | 3 (42.9%)         | 20 (46.5%)      | 0.857 |
| MRA                | 0 (0%)            | 4 (9.3%)        | 0.40  |
| Statins            | 4 (57.1%)         | 24 (55.8%)      | 0.948 |

Expressed as n(%)

ACEi: Angiotensin-converting enzyme inhibitors; ARB: Angiotensin receptor blockers; CCB: Calcium channel blocker; DPP-4: Dipeptidyl peptidase-4; ED: erectile dysfunction; GLP1-RA: Glucagon-like peptide-1 receptor agonists; MRA: Mineralocorticoid receptor antagonists; SGLT2i: Sodium-glucose Cotransporter-2 inhibitors
