# Supplementary material for: The Associations between Kidney Function and Sexual Dysfunction among Males and Females with Type 2 Diabetes Mellitus
Source: MDPI journal article supplement (doi:10.3390/medicina59050969), 2023-05-17
Supplement: s1 [file s1]

**Supplementary Table S4. Correlations among age and FSFI domains and eGFR in female patients**

|              | r      | P     |
|--------------|--------|-------|
| Desire       | -0.487 | 0.006 |
| Arousal      | -0.515 | 0.004 |
| Lubrication  | -0.742 | 0.001 |
| Orgasm       | -0.547 | 0.002 |
| Satisfaction | -0.258 | 0.169 |
| Pain         | -0.508 | 0.004 |
| Total score  | -0.610 | 0.001 |
| eGFR         | -0.488 | 0.001 |

eGFR: estimated glomerular filtration rate; FSFI: Female Sexual Function Index
