# Supplementary material for: The Associations between Kidney Function and Sexual Dysfunction among Males and Females with Type 2 Diabetes Mellitus
Source: Medicina (Kaunas). 2023 May 17;59(5):969. doi: 10.3390/medicina59050969 (PMC10220764; doi:10.3390/medicina59050969)
Supplement: Supplementary file 1 [file medicina-59-00969-s001.zip]

Archive with 4 entries (4 files):
- Supplementary table 1.pdf
- Supplementary table 2.pdf
- Supplementary table 3.pdf
- Supplementary table 4.pdf
